# Supplementary material for: Effect of magnetic fields on the methyl rotation in a paramagnetic cobalt(ii) complex. Quasielastic neutron scattering studies
Source: Royal Society of Chemistry journal article supplement (doi:10.1039/c8cp01660g), 2018-01-01
Supplement: c8cp01660g1.pdf [file c8cp01660g1.pdf]

## Supplementary information

### **Effect of magnetic fields on the methyl rotation in a paramagnetic cobalt(II) complex. Quasielastic neutron scattering studies**

Shelby E. Stavretis,<sup>1</sup> Eugene Mamontov,<sup>2,\*</sup> Duncan H. Moseley,<sup>1</sup> Yongqiang Cheng,<sup>2</sup> Luke L. Daemen,<sup>2</sup> A. J. Ramirez-Cuesta,<sup>2</sup> Ziling Xue<sup>1,\*</sup>

<sup>1</sup> *Department of Chemistry, University of Tennessee, Knoxville, Tennessee, United States*

<sup>2</sup> *Chemical and Engineering Materials Division, Oak Ridge National Laboratory, Oak Ridge, Tennessee, United States*

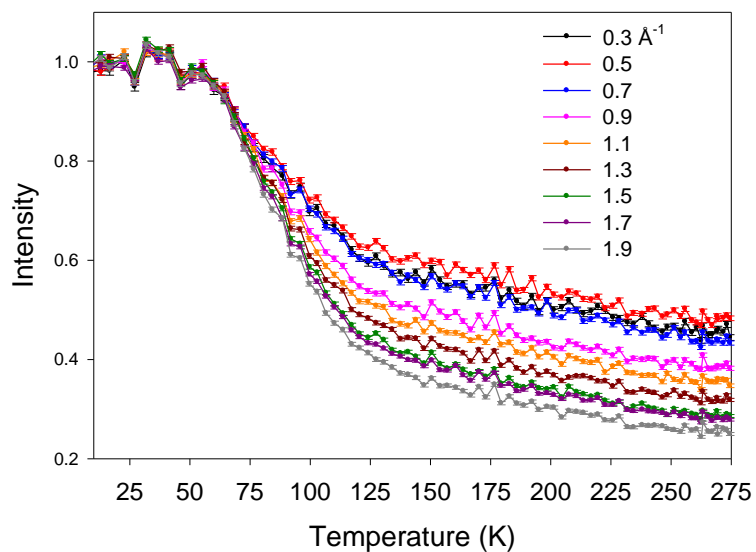

**Fig. S1** Fixed window elastic scattering neutron intensity scan at variable  $|Q|$ .

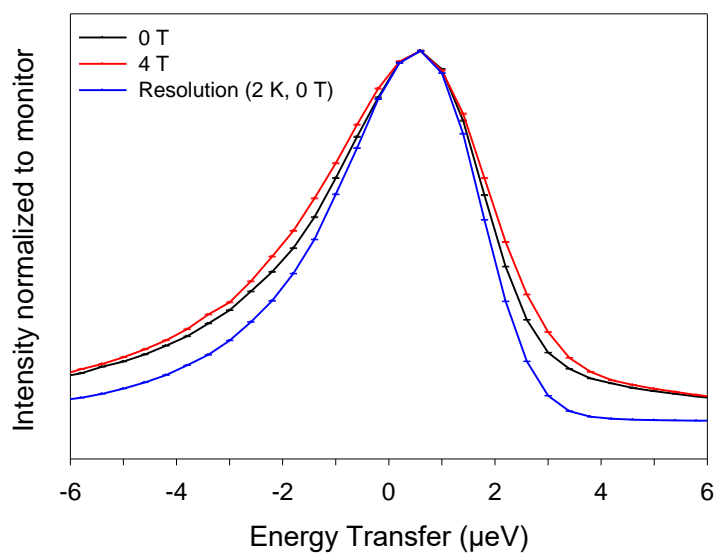

**Fig. S2** Comparison of resolution function at 2 K with QENS data at 100 K for 0 and 4 T. The data presented here is zoomed in around the elastic line to emphasize the difference in the broadening.

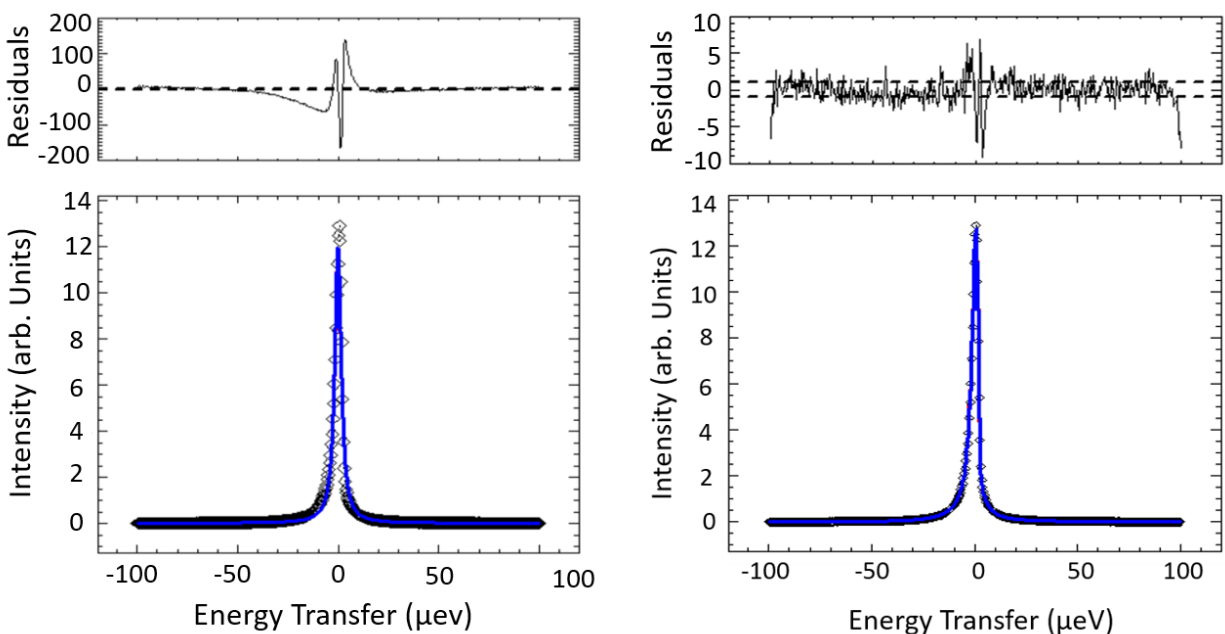

**Fig. S3** (Left) The rejected Lorentzian model (blue line) to fit a representative data set at 100 K and 0 T. The difference between the data and the model is shown on the top panel. (Right) The use of the Cole-Cole equation (blue line) to fit the aforementioned data set. The parameters from these fittings are given in Table S1.

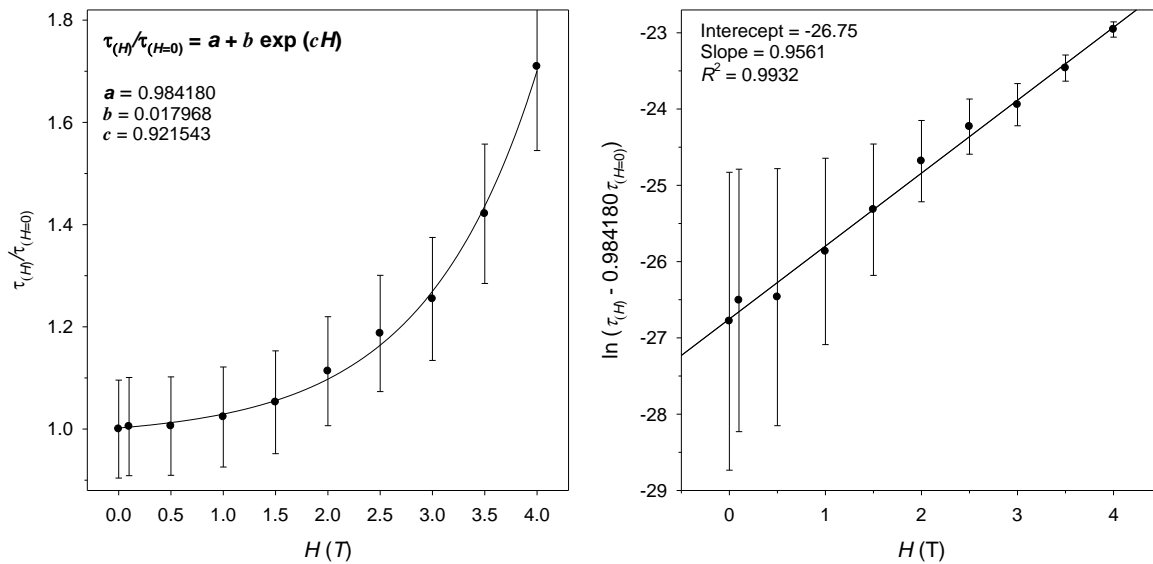

**Fig. S4** (Left) Plot of  $\tau_{(H)}/\tau_{(H=0)}$  vs.  $H$  at 100 K.  $a$ ,  $b$  and  $c$  are fitting constants. (Right) Plot of  $\ln(\tau_{(H)}/\tau_{(H=0)} - 0.984180)$  vs  $H$ . The number  $a = 0.984180$  is from the fitting of Fig. S4-Left.

**Table S1** Comparison of the broadening and elastic parameters of the QENS peak at different fields. The error in the  $E_0$  and elastic parameters are in parentheses.

| <b>80 K, summed over all <math>Q</math></b>  |                                                      |                            |                                                        |                              |
|----------------------------------------------|------------------------------------------------------|----------------------------|--------------------------------------------------------|------------------------------|
| <b>Field<br/>(T)</b>                         | <b><math>E_0</math>, <math>\mu\text{eV}^a</math></b> | <b><math>\alpha</math></b> | <b>Elastic scattering<br/>fraction, <math>x</math></b> | <b><math>\tau</math> (s)</b> |
| 0.0                                          | 1.19(6)                                              | $7.8(4) \times 10^{-2}$    | 0.632(4)                                               | $5.6(3) \times 10^{-10}$     |
| 4.0                                          | 0.323(17)                                            | $8.3(3) \times 10^{-2}$    | 0(0)                                                   | $2.04(10) \times 10^{-9}$    |
| <b>90 K, summed over all <math>Q</math></b>  |                                                      |                            |                                                        |                              |
| <b>Field<br/>(T)</b>                         | <b><math>E_0</math>, <math>\mu\text{eV}^a</math></b> | <b><math>\alpha</math></b> | <b>Elastic scattering<br/>fraction, <math>x</math></b> | <b><math>\tau</math> (s)</b> |
| 0.0                                          | 2.43(12)                                             | $7.6(3) \times 10^{-2}$    | 0.577(2)                                               | $2.71(13) \times 10^{-10}$   |
| 4.0                                          | 1.14(6)                                              | $1.7(3) \times 10^{-1}$    | 0.332(5)                                               | $5.8(3) \times 10^{-10}$     |
| <b>100 K, summed over all <math>Q</math></b> |                                                      |                            |                                                        |                              |
| <b>Field<br/>(T)</b>                         | <b><math>E_0</math>, <math>\mu\text{eV}^a</math></b> | <b><math>\alpha</math></b> | <b>Elastic scattering<br/>fraction, <math>x</math></b> | <b><math>\tau</math> (s)</b> |
| 0.0                                          | 4.46(22)                                             | $9.2(2) \times 10^{-2}$    | 0.537(1)                                               | $1.48(7) \times 10^{-10}$    |
| 0.1                                          | 4.43(22)                                             | $8.9(2) \times 10^{-2}$    | 0.541(1)                                               | $1.49(8) \times 10^{-10}$    |
| 0.5                                          | 4.43(22)                                             | $8.4(2) \times 10^{-2}$    | 0.543(1)                                               | $1.49(8) \times 10^{-10}$    |
| 1.0                                          | 4.35(22)                                             | $8.8(2) \times 10^{-2}$    | 0.538(1)                                               | $1.51(8) \times 10^{-10}$    |
| 1.5                                          | 4.23(21)                                             | $8.8(2) \times 10^{-2}$    | 0.537(1)                                               | $1.55(8) \times 10^{-10}$    |
| 2.0                                          | 4.00(20)                                             | $1.1(2) \times 10^{-1}$    | 0.515(1)                                               | $1.64(8) \times 10^{-10}$    |
| 2.5                                          | 3.75(19)                                             | $1.4(2) \times 10^{-1}$    | 0.490(2)                                               | $1.75(9) \times 10^{-10}$    |
| 3.0                                          | 3.55(18)                                             | $1.4(2) \times 10^{-1}$    | 0.484(2)                                               | $1.85(9) \times 10^{-10}$    |
| 3.5                                          | 3.13(16)                                             | $1.7(2) \times 10^{-1}$    | 0.446(2)                                               | $2.10(11) \times 10^{-10}$   |
| 4.0                                          | 2.61(13)                                             | $2.0(3) \times 10^{-1}$    | 0.396(2)                                               | $2.53(12) \times 10^{-10}$   |

<sup>a</sup> Total uncertainties  $\sigma_{\text{total}}$  in  $E_0$  are given in Table S1 here:<sup>8</sup>  $\sigma_{\text{total}}^2 = \sigma_{\text{ran}}^2 + \sigma_{\text{sys}}^2$ . Random uncertainty  $\sigma_{\text{ran}}$  for each  $E_0$  value is obtained from the fitting of the QENS data using Eq. 1. Systematic uncertainty  $\sigma_{\text{sys}}$  in  $E_0$  from the QENS studies here is estimated to be 5% of  $E_0$ .

Analysis of the elastic scattering fraction,  $x$ , between 0 and 4 T in Table S1 shows that the elastic fraction ( $x$ ) is reduced with magnetic field at all three temperatures, suggesting that more methyl groups activated by the application of the magnetic field. Yet, the methyl rotation becomes slower with the field. At this time, we cannot explain this trend. Since  $\tau$ ,  $x$  and  $\alpha$  are co-dependent parameters, we have investigated the fitting of the QENS data with the elastic parameter ( $x$ ) fixed at the value at 0 T for the three temperatures. Representative results of this fitting for the data at 80 K are given in Fig. S5. The chi-squared values  $\chi^2$  for the fitting at all three temperatures are given in Table S2 below.

The fitting with fixed  $x$  is comparatively worse. Not only are chi-squared values  $\chi^2$  much higher in the fixed  $x$ , but also there is a large systematic deviation between the data and the model, which is evident in the difference plots (Fig. S5-Top) demonstrating the inadequacy of the fits with the elastic fraction  $x$  fixed at 0 T. Therefore we have used an unfixed  $x$  for the QENS fittings in Table S1.

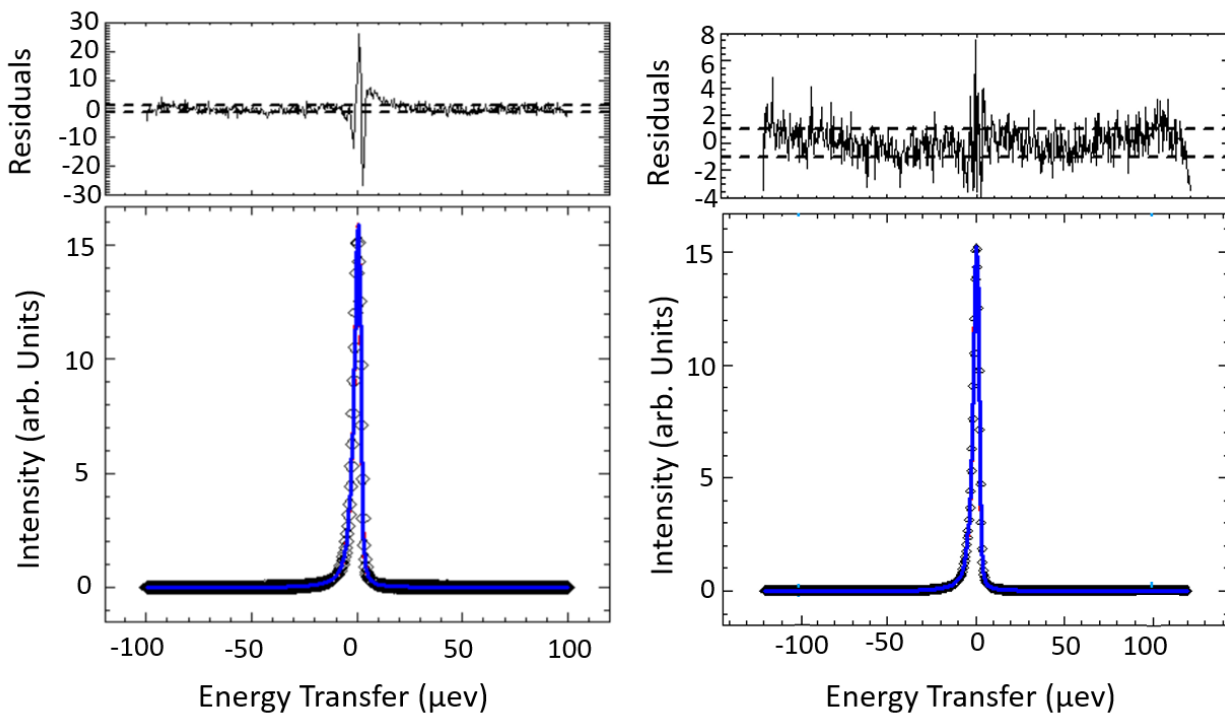

**Fig. S5** (Left) Fitting (blue line) of the QENS data at 80 K with  $x$  fixed at the values at 0 T using the Cole-Cole equation. The difference between the data and the model is shown on the top. (Right) Fitting (blue line) of the same data with  $x$  unfixed using the Cole-Cole equation.

**Table S2** Chi-squared  $\chi^2$  values at 4 T for fixed and unfixed elastic parameter ( $x$ ) fittings

| Temperature (K) | Fixed $x$ | Unfixed $x$ |
|-----------------|-----------|-------------|
| 80              | 10.554    | 1.632       |
| 90              | 32.186    | 3.332       |
| 100             | 17.612    | 5.124       |

**Table S3** Average spin density  $\rho_{s\text{-average}}$  per atom in **1**.

| Atom         | $\rho_{s\text{-average}}$ |
|--------------|---------------------------|
| H6           | $-1.28 \times 10^{-5}$    |
| H3-5 or H7-9 | $7.16 \times 10^{-5}$     |
| H1-2         | $9.00 \times 10^{-4}$     |
| C6           | $3.40 \times 10^{-3}$     |
| C2-3         | $-9.34 \times 10^{-4}$    |
| C1,5         | $2.10 \times 10^{-3}$     |
| O2-3         | $2.70 \times 10^{-2}$     |
| O1           | $1.91 \times 10^{-1}$     |
| Co1          | 2.81                      |

#### References for ESI

1. E. Mamontov and K. W. Herwig, *Rev. Sci. Instrum.*, 2011, **82**, 085109.
2. R.T. Azuah, L.R. Kneller, Y. Qiu, P.L.W. Tregenna-Piggott, C.M. Brown, J.R.D. Copley, and R.M. Dimeo, *J. Res. Natl. Inst. Stan. Technol.*, 2009, **114**, 341-358.
3. G. Kresse and D. Joubert, *Phys. Rev. B*, 1999, **59**, 1758-1775.
4. P. E. Blöchl, *Phys. Rev. B*, 1994, **50**, 17953-17979.
5. J. P. Perdew, K. Burke and M. Ernzerhof, *Phys. Rev. Lett.*, 1996, **77**, 3865-3868.
6. F. Zhou, M. Cococcioni, C. A. Marianetti, D. Morgan and G. Ceder, *Phys. Rev. B*, 2004, **70**, 235121.
7. J. Klimeš, D. R. Bowler and A. Michaelides, *J. Phys. Condens. Matter*, 2010, **22**, 022201.
8. J. R. Taylor, *An Introduction to Error Analysis: The Study of Uncertainties in Physical Measurements*, University Science Books, Mill Valley, CA, 1982.
